# Supplementary material for: Analysis of biodiesel and oil samples by on-line calibration using a Flow Blurring® multinebulizer in ICP OES without oxygen addition
Source: Royal Society of Chemistry journal article supplement (doi:10.1039/c2ja30202k), 2012-01-01
Supplement: c2ja30202k.pdf [file c2ja30202k.pdf]

Supplementary Material (ESI) for Journal of Analytical Atomic Spectrometry  
This journal is © The Royal Society of Chemistry 2012

**SUPPORTING INFORMATION**

**ANALYSIS OF BIODIESEL AND OIL SAMPLES BY ON-LINE  
CALIBRATION USING A FLOW BLURRING<sup>®</sup> MULTINEBULIZER  
ON ICP OES WITHOUT OXYGEN ADDITION**

*Miguel Ángel Aguirre, Nikolay Kovachev, Montserrat Hidalgo and Antonio Canals\**

*Departamento de Química Analítica, Nutrición y Bromatología e Instituto Universitario de Materiales,  
Universidad de Alicante, Apdo. 99, Alicante E-03080, Spain. \*E-mail: a.canals@ua.es*

**Aerosol characterization**

Fig. S1 on ESI† shows the accumulated percent volume of primary and tertiary aerosols produced by the SSI and the FBMN-based systems under optimized conditions of gas and liquid flow rates. For the FBMN-based system, primary aerosols generated by each nozzle of the nebulizer from either organic or aqueous solutions were studied separately (i.e., organic aerosol generated by nozzle 1 and aqueous aerosols generated by nozzles 2 and 3). Tertiary aerosol produced by the FBMN-based system, consisting on a mixture of organic and aqueous aerosols generated from the different nozzles, was measured at the exit of a 2.0 mm i.d. injector tube connected to the cyclonic-type spray chamber, pursuant to the conditions used in ICP OES measurement. With the MM nebulizer and the corresponding SSI system, only primary and tertiary organic aerosols were studied. In this case, tertiary organic aerosol was measured at the exit of the 0.8 mm i.d. injector tube connected to the same cyclonic spray chamber.

Fig. S1 on ESI† shows how primary aqueous aerosols generated with the FBMN from nozzles 2 and 3 have very similar characteristics, evidencing a good matching between these two nozzles. As expected, aerosol droplets generated from organic solutions (FBMN nozzle 1) are slightly smaller than those generated from aqueous solutions. In this case, the main reasons for this behaviour are the lower viscosity and surface tension of organic solvent and the lower liquid uptake rate through nozzle 1 of the FBMN<sup>1-6</sup>. According to Fig. S1 on ESI†, practically all the organic aerosol volume is contained in droplets smaller than 33 µm, whereas all the aqueous aerosol volume is contained in droplets smaller than 42 µm. The aforementioned

figure also shows how that MM nebulizer generates coarser droplets than FBMN, with practically all the organic aerosol volume contained in droplets smaller than 114  $\mu\text{m}$ .

The analysis of accumulated percent volume of tertiary aerosol obtained for the two systems reveals that droplets larger than approximately 20  $\mu\text{m}$  are, in both cases, removed by the spray chamber. This result can be associated with the spray chamber cut-off diameter ( $d_c$ ) if neglecting the injector tube contribution to the obtained tertiary aerosol distribution. The percent volume of primary aerosols contained in droplets smaller than the  $d_c$  (20  $\mu\text{m}$ ) was 96%, 88% and 85% for nozzles 1, 2 and 3 of the FBMN, respectively, and 27%  $\mu\text{m}$  for the MM nebulizer, which predicts a higher spray chamber filtering action for the SSI system.

It is also interesting to evaluate the percent volume of aerosol droplets that, entering the ICP torch, contributes positively to signal. According to the literature, droplets larger than approximately 8  $\mu\text{m}$  in diameter moving at relatively high velocities, normally contribute negatively to the signal-to-background ratio in ICP spectrometry<sup>7</sup>. From Fig. S1 on ESI† it can be seen that the percentage of the aerosol volume contained in droplets smaller than 8  $\mu\text{m}$  was approximately equal for the two systems (58% and 64% for FBMN-based system and the SSI system, respectively). However, the mean velocities of the tertiary aerosol produced by the FBMN-based system was lower (4  $\text{m s}^{-1}$ ) than that of the SSI system (11  $\text{m s}^{-1}$ ). This fact could be due to the i.d. of the injector tube (see Table S1 on ESI†) and could positively contribute to the signal obtained with the multilinebulization system.

Other useful information regarding the obtained aerosols (i.e., Sauter mean diameter ( $D_{3,2}$ ), axial mean velocity ( $V_m$ ), volume median diameter ( $D_{50}$ ) and droplet diameter containing 99% of the total aerosol volume ( $D_{99}$ )) is also available in Table S3 on ESI†.

Lastly, it is noteworthy that the results obtained correspond to measurements carried out with both nebulizers working at the optimized gas and liquid flow rates for ICP OES measurements of organic samples (see Table S1 on ESI†), and not under the working conditions recommended by the MM manufacturer. To reach optimum conditions in ICP OES, the MM nebulizer needs a higher carrier gas supply than FBMN for the same 100  $\mu\text{l min}^{-1}$  liquid sample inlet (i.e., 800 mbar (0.4  $\text{L min}^{-1}$ ) and 400 mbar (0.2  $\text{L min}^{-1}$  per each nozzle, approximately) for the MM nebulizer and FBMN, respectively). This fact makes the use of Flow Blurring<sup>®</sup> nebulization devices ideal for a multiple nozzle platform in ICP OES analysis, because the efficient mixing between the gas and liquid phases leads to energy-efficiency improvements over other pneumatic nebulizers.

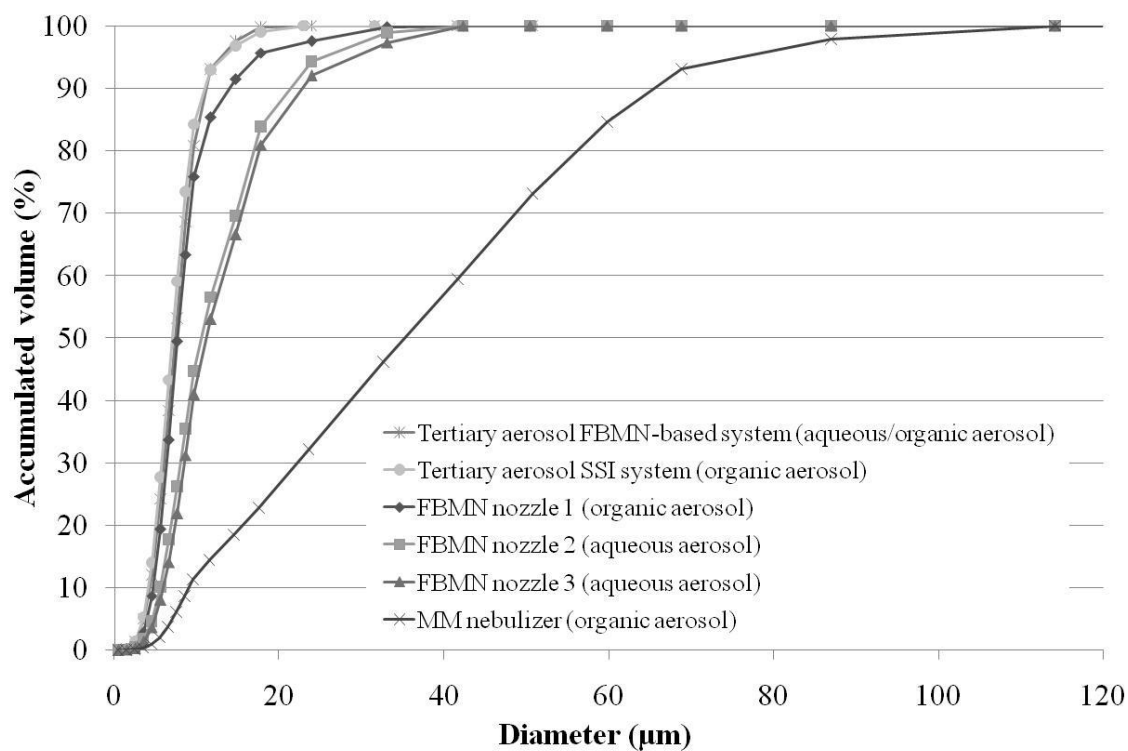

**Fig. S1.** Accumulated percent volume of primary and tertiary aerosols produced by the FBMN-based system and the SSI system under optimized gas and liquid flow rate conditions (Table S1 on ESI†).

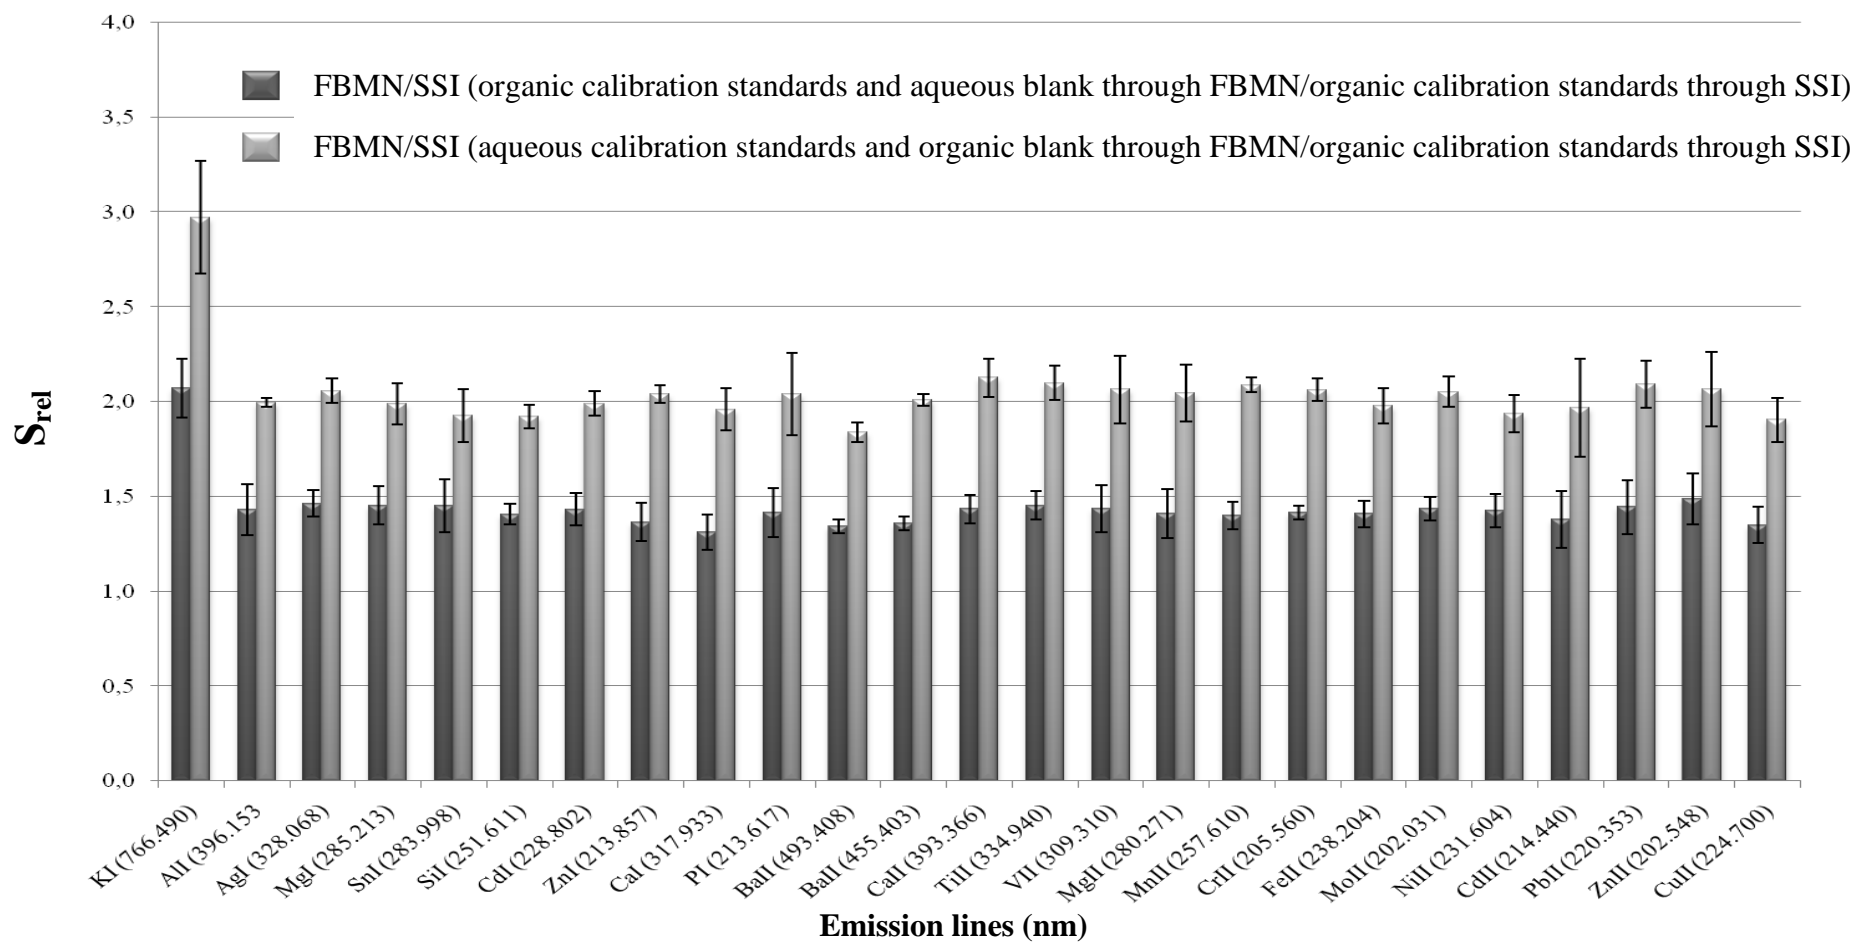

**Fig. S2.** Relative sensitivity of FBMN and SSI systems ( $S_{rel} = S_{\text{FBMN-based system}} / S_{\text{SSI system}}$ ) in two different sensitivity evaluation experiments (see main text for explanation).

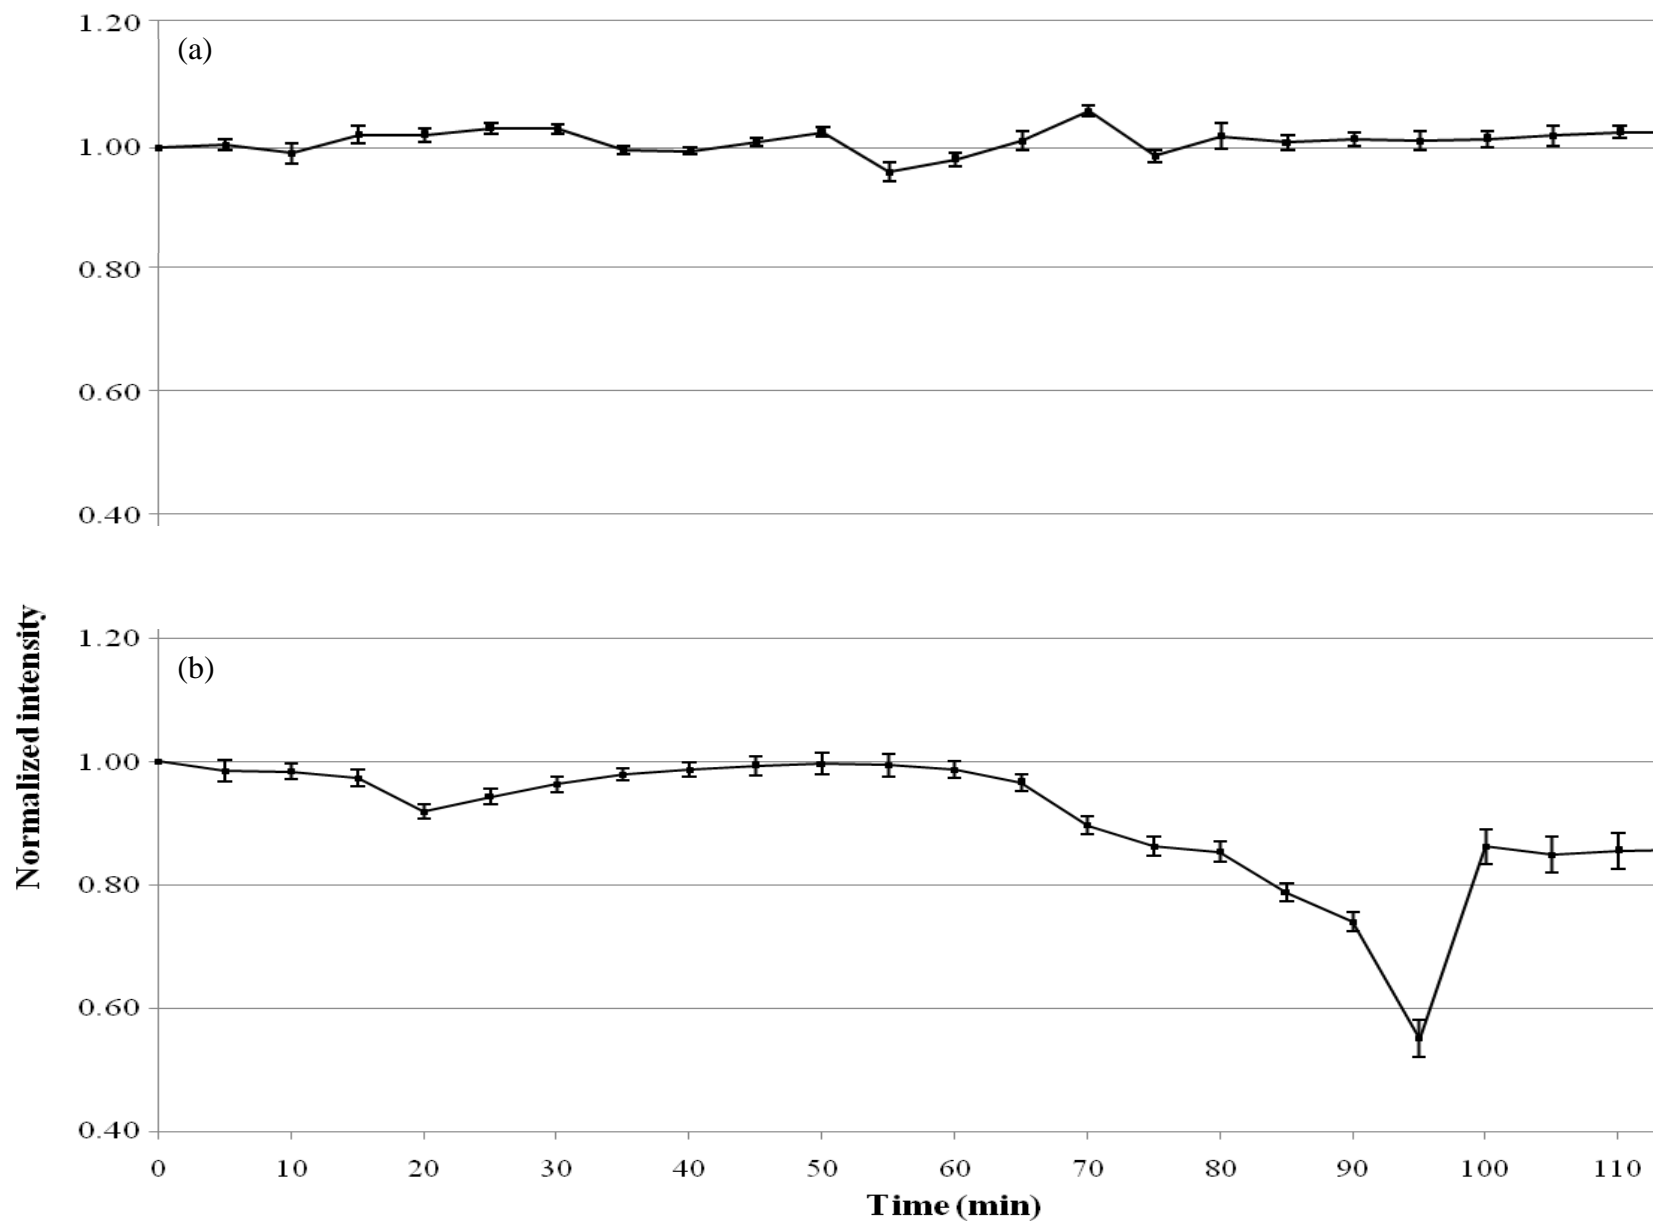

**Fig. S3.** Evolution of the emission signal of the average of all emission lines evaluated during two hours of continuous nebulization with (a) FBMN-based system ( $1 \mu\text{g g}^{-1}$  of organic standard solution at  $100 \mu\text{L min}^{-1}$  and  $1 \mu\text{g g}^{-1}$  of aqueous blank at  $400 \mu\text{L min}^{-1}$ ) and (b) SSI system ( $1 \mu\text{g g}^{-1}$  of organic standard solution at  $100 \mu\text{L min}^{-1}$ ).

**Table S1.** ICP OES operating conditions.

| <b>Plasma parameters</b>                             | <b>FBMN-based system</b> | <b>SSI system</b> |
|------------------------------------------------------|--------------------------|-------------------|
| Outer gas flow (L min <sup>-1</sup> )                | 15                       | 15                |
| Intermediate gas flow (L min <sup>-1</sup> )         | 0.2                      | 1.2               |
| RF power (W)                                         | 1350                     | 1350              |
| Integration time (s)                                 | Variable                 | Variable          |
| Read time (s)                                        | Variable                 | Variable          |
| Number of replicates                                 | 5                        | 5                 |
| Viewing mode                                         | Axial                    | Axial             |
| <b>Sample introduction system</b>                    |                          |                   |
| Nebulizer type                                       | FBMN                     | MicroMist         |
| Spray chamber                                        | cyclonic                 | cyclonic          |
| Gas flow rate (L min <sup>-1</sup> )                 | 0.60                     | 0.40              |
| Pressure gas supplied (mbar)                         | 400                      | 800               |
| Total liquid uptake rate (μL min <sup>-1</sup> )     | 500                      | 100               |
| Organic sample uptake rate (μL min <sup>-1</sup> )   | 100                      | 100               |
| Aqueous standard uptake rate (μL min <sup>-1</sup> ) | 400                      | -                 |
| Injector tube (mm. id)                               | 2.0                      | 0.8               |

**Table S2.** Emission lines and energy values.

| <b>Emission line (nm)</b>  | <b>Excitation Energy (eV)</b> | <b>Ionization Energy (eV)</b> | <b>E<sub>sum</sub> (eV)</b> |
|----------------------------|-------------------------------|-------------------------------|-----------------------------|
| KI (766.490)               | 1.62                          | -                             | 1.62                        |
| NaI (589.592) <sup>a</sup> | 2.10                          | -                             | 2.10                        |
| NaI (588.995) <sup>b</sup> | 2.11                          | -                             | 2.11                        |
| AlI (396.153)              | 3.14                          | -                             | 3.14                        |
| AgI (328.068)              | 3.78                          | -                             | 3.78                        |
| MgI (285.213)              | 4.34                          | -                             | 4.34                        |
| SnI (283.998)              | 4.78                          | -                             | 4.78                        |
| SiI (251.611)              | 4.95                          | -                             | 4.95                        |
| CdI (228.802)              | 5.41                          | -                             | 5.41                        |
| ZnI (213.857)              | 5.80                          | -                             | 5.80                        |
| CaI (317.933)              | 7.04                          | -                             | 7.04                        |
| PI (213.617)               | 7.22                          | -                             | 7.22                        |
| BaII (493.408)             | 2.51                          | 5.21                          | 7.72                        |
| BaII (455.403)             | 2.72                          | 5.21                          | 7.93                        |
| CaII (393.366)             | 3.15                          | 6.11                          | 9.26                        |
| TiII (334.940)             | 3.74                          | 6.82                          | 10.56                       |
| VII (309.310)              | 4.40                          | 6.74                          | 11.14                       |
| MgII (280.271)             | 4.42                          | 7.65                          | 12.07                       |
| MnII (257.610)             | 4.81                          | 7.44                          | 12.25                       |
| CrII (205.560)             | 6.03                          | 6.77                          | 12.80                       |
| FeII (238.204)             | 5.20                          | 7.87                          | 13.07                       |
| MoII (202.031)             | 6.13                          | 7.10                          | 13.23                       |
| NiII (231.604)             | 6.39                          | 7.64                          | 14.03                       |
| CdII (214.440)             | 5.78                          | 8.99                          | 14.77                       |
| PbII (220.353)             | 7.37                          | 7.42                          | 14.79                       |
| ZnII (202.548)             | 6.12                          | 9.39                          | 15.51                       |
| CuII (224.700)             | 8.23                          | 7.73                          | 15.96                       |

<sup>a</sup>only measured with FBMN-based system

<sup>b</sup>only measured with SSI system

**Table S3.** Primary and tertiary aerosol characterization of MM nebulizer, FBMN, SSI system and FBMN-based system.

| Primary aerosol                 | $D_{3,2}^a$ | $V_m^b$    | $D_{50}^c$ | $D_{99}^d$ |
|---------------------------------|-------------|------------|------------|------------|
| FBMN nozzle 1 (organic aerosol) | 10.7±0.3    | 12.1±0.2   | 7.7±0.3    | 30±5       |
| FBMN nozzle 2 (aqueous aerosol) | 16.5±0.3    | 18.1±0.3   | 10.6±0.8   | 34±4       |
| FBMN nozzle 3 (aqueous aerosol) | 16.67±0.12  | 18.0±0.4   | 11.2±0.2   | 39±2       |
| MM nebulizer (organic aerosol)  | 40±2        | 35.4±0.2   | 36±3       | 102±21     |
| Tertiary aerosol                | $D_{3,2}^a$ | $V_m^b$    | $D_{50}^c$ | $D_{99}^d$ |
| FBMN-based system               | 7.80±0.14   | 3.7±0.2    | 7.4±0.2    | 16.8±1.0   |
| SSI system                      | 8.06±0.09   | 11.14±0.08 | 7.07±0.10  | 17.9±0.7   |

<sup>a</sup>Sauter mean diameter ( $\mu\text{m}$ ).

<sup>b</sup>Axial mean velocity ( $\text{m s}^{-1}$ ).

<sup>c</sup>Volume median diameter ( $\mu\text{m}$ ).

<sup>d</sup>Droplet diameter containing 99 % of the total aerosol volume ( $\mu\text{m}$ ).



**Table S4.** RSD (%) values for short-term precision (STP) at three different concentration levels and for long-term precision (LTP) using the SSI and FBMN systems.

| Emission lines (nm) | RSD (%)              |                  |                  |                      |                      |                  |     |                      |
|---------------------|----------------------|------------------|------------------|----------------------|----------------------|------------------|-----|----------------------|
|                     | SSI system           |                  |                  |                      | FBMN-based system    |                  |     |                      |
|                     | STP (%) <sup>a</sup> |                  |                  | LTP (%) <sup>b</sup> | STP (%) <sup>a</sup> |                  |     | LTP (%) <sup>b</sup> |
| 0.4 <sup>c</sup>    | 1.2 <sup>c</sup>     | 2.0 <sup>c</sup> | 0.4 <sup>c</sup> |                      | 1.2 <sup>c</sup>     | 2.0 <sup>c</sup> |     |                      |
| KI (766.490)        | 3                    | 3                | 3                | 12                   | 2                    | 1.2              | 1.3 | 2                    |
| NaI (589.592)       | -                    | -                | -                | -                    | 1.4                  | 2                | 2   | 2                    |
| NaI (588.995)       | 2                    | 2                | 3                | 11                   | -                    | -                | -   | -                    |
| AlI (396.153)       | 3                    | 3                | 2                | 12                   | 1.4                  | 1.2              | 1.5 | 2                    |
| AgI (328.068)       | 1.5                  | 3                | 2                | 10                   | 2                    | 1.3              | 1.5 | 2                    |
| MgI (285.213)       | 3                    | 3                | 2                | 12                   | 2                    | 1.5              | 1.2 | 2                    |
| SnI (283.998)       | 2                    | 2                | 2                | 12                   | 2                    | 1.5              | 2   | 2                    |
| SiI (251.611)       | 2                    | 2                | 2                | 12                   | 2                    | 1.4              | 2   | 2                    |
| CdI (228.802)       | 1.3                  | 2                | 2                | 11                   | 1.4                  | 2                | 2   | 2                    |
| ZnI (213.857)       | 2                    | 2                | 2                | 11                   | 2                    | 1.4              | 2   | 2                    |
| CaI (317.933)       | 4                    | 2                | 2                | 12                   | 1.4                  | 1.5              | 1.4 | 2                    |
| PI (213.617)        | 2                    | 2                | 2                | 13                   | 2                    | 2                | 2   | 2                    |
| BaII (493.408)      | 2                    | 2                | 2                | 12                   | 0.7                  | 0.9              | 0.8 | 2                    |
| BaII (455.403)      | 2                    | 2                | 2                | 12                   | 1.1                  | 1.2              | 1   | 1.5                  |
| CaII (393.366)      | 2                    | 1.2              | 2                | 11                   | 1.5                  | 0.9              | 2   | 2                    |
| TiII (334.940)      | 2                    | 2                | 2                | 11                   | 2                    | 2                | 2   | 2                    |
| VII (309.310)       | 5                    | 4                | 2                | 12                   | 1.4                  | 1                | 1.5 | 2                    |
| MgII (280.271)      | 2                    | 2                | 2                | 11                   | 0.9                  | 1.3              | 1.1 | 2                    |
| MnII (257.610)      | 2                    | 3                | 2                | 12                   | 1.5                  | 1.4              | 1.3 | 2                    |
| CrII (205.560)      | 2                    | 2                | 3                | 12                   | 2                    | 1.3              | 2   | 2                    |
| FeII (238.204)      | 2                    | 2                | 3                | 11                   | 1.3                  | 2                | 1.2 | 2                    |
| MoII (202.031)      | 2                    | 1.5              | 2                | 12                   | 2                    | 2                | 2   | 2                    |
| NiII (231.604)      | 3                    | 2                | 3                | 12                   | 2                    | 2                | 2   | 2                    |
| CdII (214.440)      | 3                    | 2                | 3                | 11                   | 0.6                  | 1.4              | 1   | 2                    |
| PbII (220.353)      | 4                    | 4                | 4                | 12                   | 2                    | 2                | 1.4 | 2                    |
| ZnII (202.548)      | 5                    | 4                | 3                | 12                   | 1.5                  | 1.4              | 2   | 2                    |
| CuII (224.700)      | 2                    | 2                | 2                | 12                   | 1.4                  | 2                | 2   | 2                    |

<sup>a</sup>The RSD values of the signal over one minute (n=5 replicates).

<sup>b</sup>The RSD values of the signal over two hours (n= 600 replicates).

<sup>c</sup>In  $\mu\text{g g}^{-1}$ .

**Table S5.** Limits of detection (LOD) obtained using conventional standard addition calibration with the SSI system and on-line standard addition calibration with the FBMN-based system.

| Emission lines (nm) | LOD (ng g <sup>-1</sup> ) |                   |
|---------------------|---------------------------|-------------------|
|                     | SSI system                | FBMN-based system |
| KI (766.490)        | 6                         | 1.3               |
| NaI (589.592)       | -                         | 1.4               |
| NaI (588.995)       | 9                         | -                 |
| AlI (396.153)       | 12                        | 6                 |
| AgI (328.068)       | 1.5                       | 0.2               |
| MgI (285.213)       | 0.8                       | 0.14              |
| SnI (283.998)       | 9                         | 1.4               |
| SiI (251.611)       | 4                         | 2                 |
| CdI (228.802)       | 1.3                       | 0.3               |
| ZnI (213.857)       | 1.2                       | 0.4               |
| CaI (317.933)       | 6                         | 1.0               |
| PI (213.617)        | 8                         | 4                 |
| BaII (493.408)      | 0.4                       | 0.11              |
| BaII (455.403)      | 1.0                       | 0.12              |
| CaII (393.366)      | 6                         | 2                 |
| TiII (334.940)      | 2                         | 0.12              |
| VII (309.310)       | 2                         | 0.7               |
| MgII (280.271)      | 1.2                       | 0.3               |
| MnII (257.610)      | 0.3                       | 0.04              |
| CrII (205.560)      | 5                         | 2                 |
| FeII (238.204)      | 2                         | 0.6               |
| MoII (202.031)      | 10                        | 4                 |
| NiII (231.604)      | 8                         | 1.0               |
| CdII (214.440)      | 2                         | 0.4               |
| PbII (220.353)      | 14                        | 7                 |
| ZnII (202.548)      | 2                         | 0.8               |
| CuII (224.700)      | 5                         | 1.2               |

**Table S6.** Concentration ( $\text{ng g}^{-1}$ ) and recovery values (%) of the three real samples of diesel using the SSI system.

| Emission lines (nm) | LOQ ( $\text{ng g}^{-1}$ ) |                | Petrol station 1           |                     | Petrol station 2           |                     | Petrol station 3           |                     |
|---------------------|----------------------------|----------------|----------------------------|---------------------|----------------------------|---------------------|----------------------------|---------------------|
|                     | Diluted oil sample         | 100% Biodiesel | Found value <sup>a,b</sup> | SR (%) <sup>c</sup> | Found Value <sup>a,b</sup> | SR (%) <sup>c</sup> | Found value <sup>a,b</sup> | SR (%) <sup>c</sup> |
| AgI (328.068)       | 5                          | 20             | <LOQ                       | 92-104              | <LOQ                       | 85-103              | 25.1±0.6                   | 100-114             |
| AlI (396.153)       | 41                         | 64             | <LOQ                       | 97-112              | 440±15                     | 84-102              | 540±22                     | 93-109              |
| BaII (455.403)      | 3                          | 4              | <LOQ                       | 89-112              | <LOQ                       | 98-113              | 4.08±0.04                  | 87-109              |
| BaII (493.408)      | 1                          | 3              | <LOQ                       | 97-108              | <LOQ                       | 93-109              | 4.00±0.04                  | 94-106              |
| CaI (317.933)       | 20                         | 30             | 61.5±1.3                   | 93-107              | 48.4±0.9                   | 93-103              | 30.8±0.4                   | 98-112              |
| CaII (393.366)      | 19                         | 31             | 62.1±1.1                   | 95-109              | 47.0±0.4                   | 94-105              | 31.6±0.2                   | 91-101              |
| CdI (228.802)       | 4                          | 11             | <LOQ                       | 89-104              | 44.6±0.5                   | 91-101              | 68.2±0.9                   | 92-104              |
| CdII (214.440)      | 7                          | 8              | <LOQ                       | 97-113              | 45.3±1.0                   | 87-101              | 69.6±1.4                   | 99-114              |
| CrII (205.560)      | 15                         | 25             | <LOQ                       | 93-110              | <LOQ                       | 98-109              | <LOQ                       | 91-108              |
| CuII (224.700)      | 16                         | 33             | 455±24                     | 93-112              | 354±16                     | 91-101              | 379±7                      | 84-106              |
| FeII (238.204)      | 5                          | 9              | <LOQ                       | 91-114              | 19.3±0.2                   | 88-102              | <LOQ                       | 95-104              |
| KI (766.490)        | 21                         | 24             | <LOQ                       | 90-101              | 25.4±0.8                   | 95-114              | <LOQ                       | 98-108              |
| MgI (285.213)       | 3                          | 4              | <LOQ                       | 88-106              | 5.73±0.12                  | 91-104              | 18.6±0.4                   | 89-103              |
| MgII (280.271)      | 4                          | 5              | <LOQ                       | 93-106              | 5.86±0.06                  | 93-108              | 18.3±0.3                   | 98-110              |
| MnII (257.610)      | 1                          | 1.4            | <LOQ                       | 90-109              | 7.0±0.3                    | 88-102              | 16.2±0.2                   | 91-102              |
| MoII (202.031)      | 34                         | 94             | <LOQ                       | 89-103              | <LOQ                       | 90-101              | <LOQ                       | 92-104              |
| NaI (588.995)       | 29                         | 33             | <LOQ                       | 97-100              | 88±2                       | 85-103              | 36.5±0.2                   | 98-107              |
| NiII (231.604)      | 27                         | 45             | <LOQ                       | 91-106              | <LOQ                       | 97-109              | <LOQ                       | 99-109              |
| PbII (220.353)      | 47                         | 60             | 137±4                      | 83-101              | 453±21                     | 94-108              | 836±33                     | 89-103              |
| PI (213.617)        | 25                         | 58             | 466±9                      | 93-111              | <LOQ                       | 92-101              | <LOQ                       | 87-105              |
| SiI (251.611)       | 13                         | 37             | <LOQ                       | 93-106              | 252±7                      | 89-106              | 163±4                      | 95-105              |
| SnI (283.998)       | 29                         | 50             | 438±24                     | 97-114              | <LOQ                       | 86-101              | 142±3                      | 83-104              |
| TiII (334.940)      | 7                          | 9              | <LOQ                       | 96-105              | <LOQ                       | 94-109              | <LOQ                       | 93-101              |
| VII (309.310)       | 7                          | 12             | <LOQ                       | 100-112             | <LOQ                       | 91-108              | <LOQ                       | 95-108              |
| ZnI (213.857)       | 4                          | 7              | <LOQ                       | 98-108              | <LOQ                       | 88-104              | <LOQ                       | 99-110              |
| ZnII (202.548)      | 6                          | 7              | <LOQ                       | 89-100              | <LOQ                       | 91-101              | <LOQ                       | 89-100              |

<sup>a</sup>The uncertainty values are the estimated standard deviation of the extrapolated concentration<sup>8</sup>. <sup>b</sup>In  $\text{ng g}^{-1}$ .

<sup>c</sup>Spike recovery of  $1 \mu\text{g g}^{-1}$ .

## References

1. A. W. Boorn and R. F. Browner, in *Inductively Coupled Plasma Emission Spectroscopy, Pt. 2: Applications and Fundamentals*, Boumans, P. W. J. M. (ed), (John Wiley & Sons, 1987). Ch. 6, pp. 151-216.
2. A. W. Boorn and R. F. Browner, *Anal. Chem.*, 1982, **54**, 1402–1410.
3. J. Farino and R. F. Browner, *Anal. Chem.*, 1984, **56**, 2709–2714.
4. J. Farino, J. R. Miller, D. D. Smith and R. F. Browner, *Anal. Chem.*, 1987, **59**, 2303–2309.
5. A. Canals, V. Hernandis and R. F. Browner, *J. Anal. At. Spectrom.*, 1990, **5**, 66–61.
6. J. Mora, V. Hernandis and A. Canals, *J. Anal. At. Spectrom.*, 1991, **6**, 573–579.
7. A. Montaser, M. G. Minnich, H. Liu, A. G. T. Gustavsson and R. F. Browner, in *Inductively Coupled Plasma Mass Spectrometry*, A. Montaser, Ed. (Wiley-VCH, New York, 1998). Ch. 5, pp. 335-420.
8. J. N. Miller and J. C. Miller, in *Statistics and Chemometrics for Analytical Chemistry*, Prentice Hall, Harlow, UK, 2005. Ch. 2, pp. 107-149.
